# Supplementary material for: FOXF2 deficiency promotes epithelial-mesenchymal transition and metastasis of basal-like breast cancer
Source: Springer Nature journal article supplement (doi:10.1186/s13058-015-0531-1), 2015-02-25

# Figure S1

## A

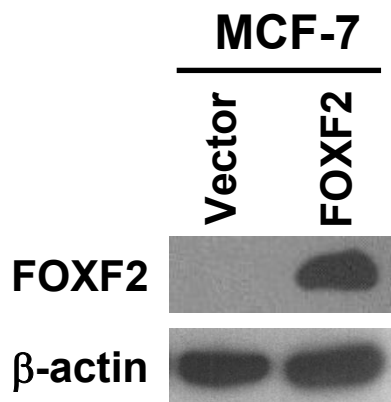

## B

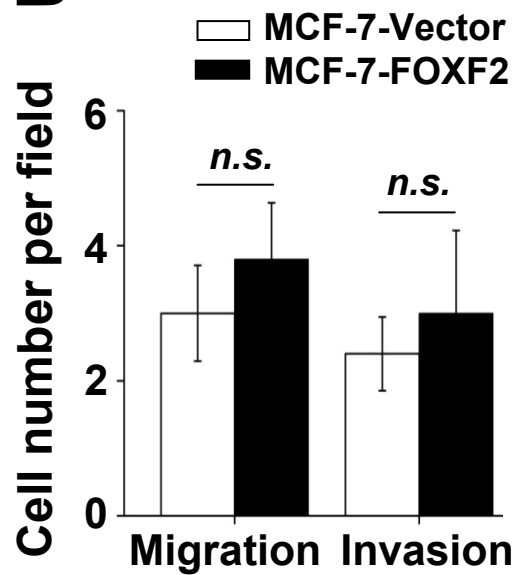

## C

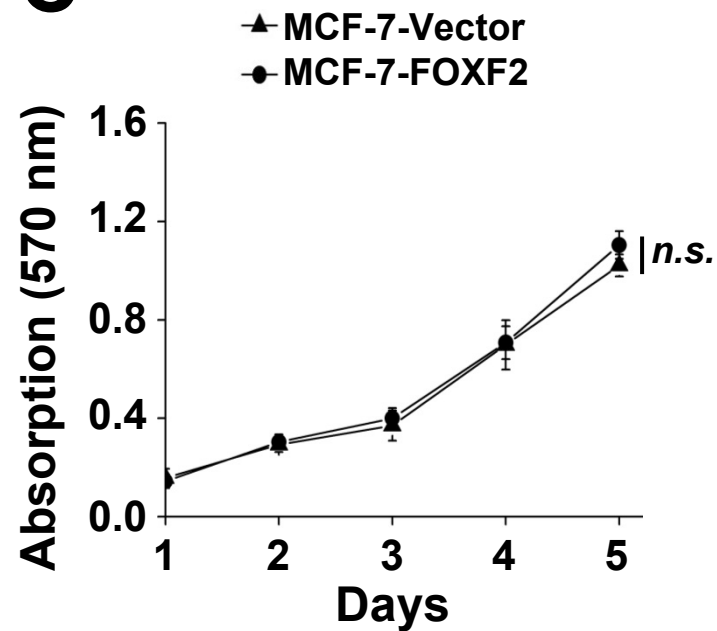

## D

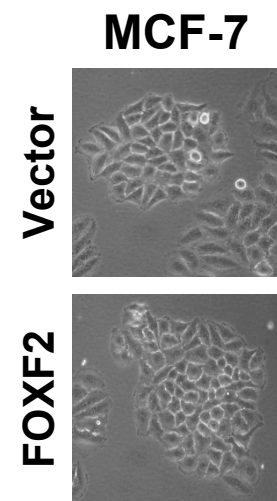

## E

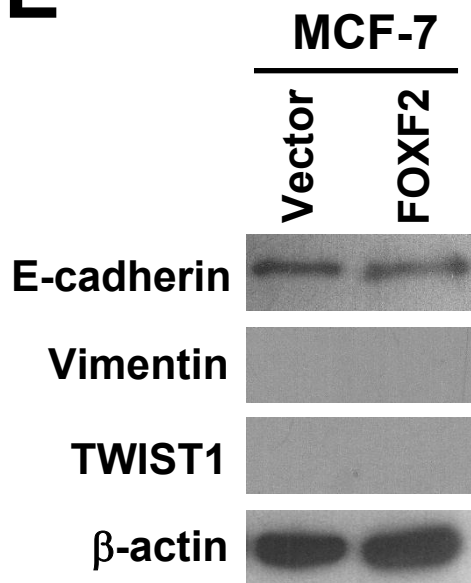

## F

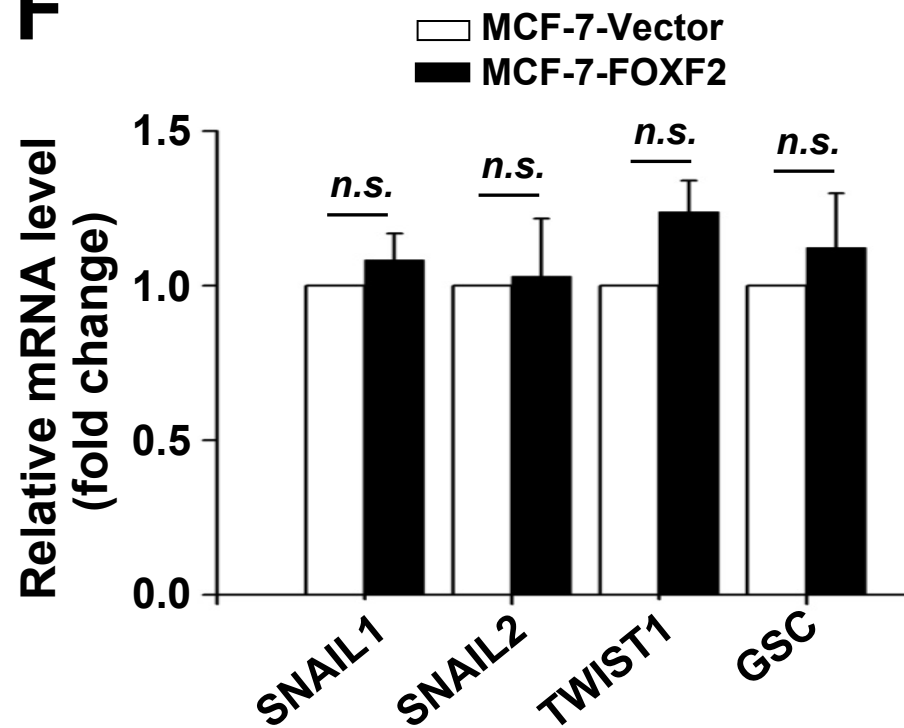

## G

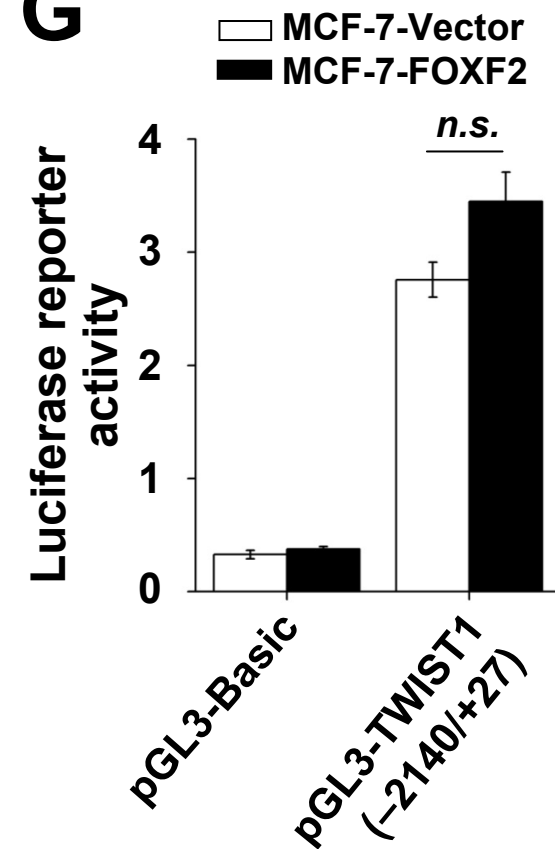

Supplement: MOESM1 [file 9781360]
